# Supplementary material for: Size-dependent cytotoxicity of copper oxide nanoparticles in lung epithelial cells
Source: Royal Society of Chemistry journal article supplement (doi:10.1039/c5en00271k), 2016-01-01
Supplement: c5en00271k1.pdf [file c5en00271k1.pdf]

Supplemental Data for Submission to Environmental Science: Nano - EN-ART-12-2015-000271.R1

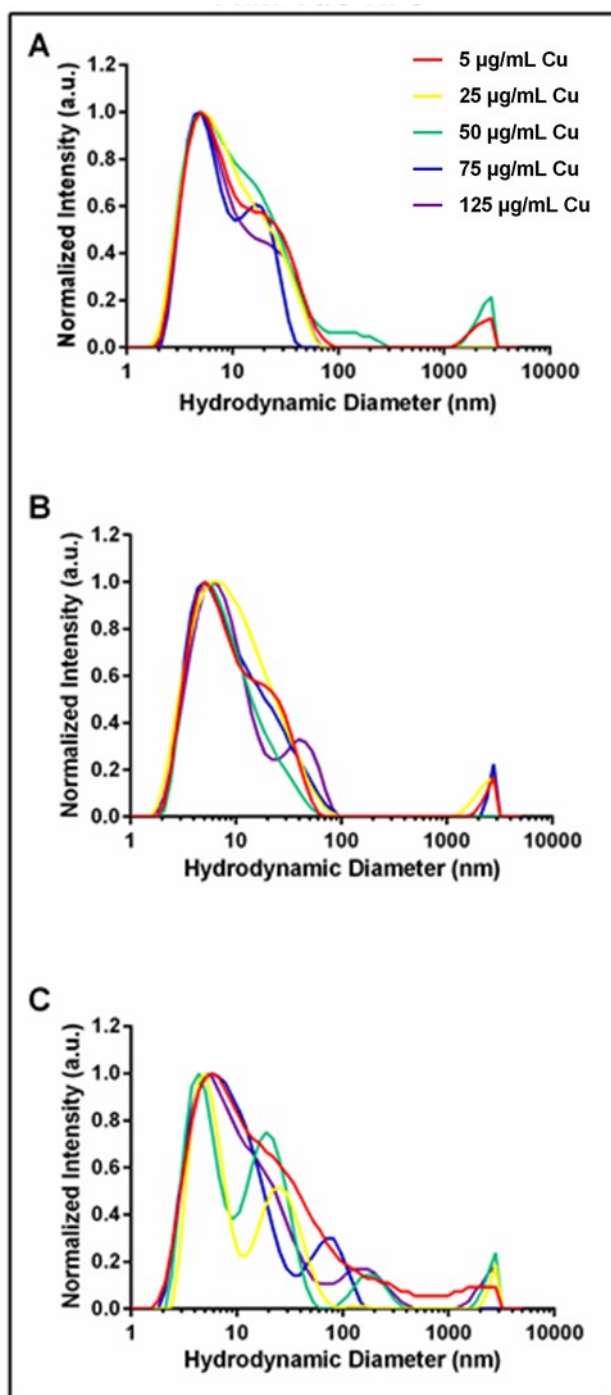

Figure 15. Distribution of hydrodynamic diameters of CuO nanoparticles (4 nm) incubated in complete medium at 37°C for 0 hours (A), 4 hours (B) and 24 hours (C).
